# Supplementary material
Source: PubMed Central journal article supplement (PMC6090349)
Supplement: tpmd180201.SD1.pdf [file tpmd180201.SD1.pdf]

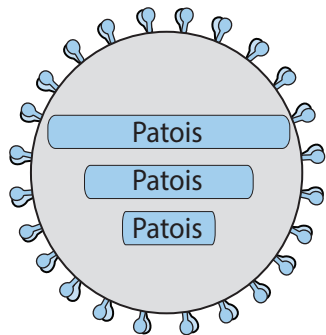

Patois virus strain 63A49  
*Sigmodon hispidus*

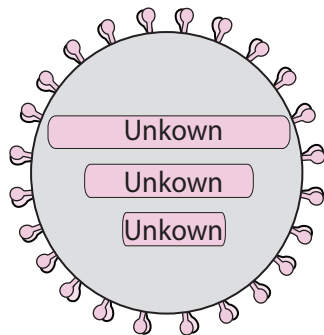

Unknown virus  
*Unknown host*

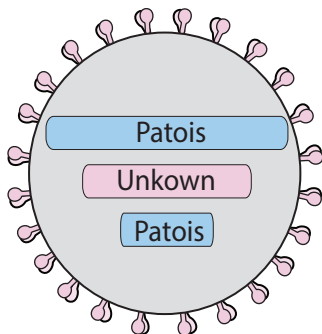

Zegla virus strain BT5012  
*Sigmodon hispidus*

| Methods  | Zegla                  |
|----------|------------------------|
| RDP      | $2.97 \times 10^{-55}$ |
| GENECONV | $1.03 \times 10^{-37}$ |
| BootScan | $6.35 \times 10^{-69}$ |
| MaxChi   | $1.51 \times 10^{-45}$ |
| Chimaera | $5.78 \times 10^{-34}$ |
| SiScan   | $1.56 \times 10^{-67}$ |
| 3Seq     | $4.25 \times 10^{-51}$ |
