# Supplementary material
Source: PubMed Central journal article supplement (PMC6090349)
Supplement: tpmd180201.SD2.pdf [file tpmd180201.SD2.pdf]

SUPPLEMENTAL FIGURE 1. Schematic view of reassortment event in Patois serogroup and summary of RDP4 analysis.
